# Supplementary material
Source: PubMed Central journal article supplement (PMC3248131)
Supplement: oncotarget-01-567-s001.pdf [file oncotarget-01-567-s001.pdf]

**Table 1: Metabolic related genes differentially expressed in GBM at the RNA level**

| Up-regulated              |                                                                                                                                                                                                                                    | Down-regulated            |                                                                                                                                                           |
|---------------------------|------------------------------------------------------------------------------------------------------------------------------------------------------------------------------------------------------------------------------------|---------------------------|-----------------------------------------------------------------------------------------------------------------------------------------------------------|
| Primary Metabolic Process | Gene                                                                                                                                                                                                                               | Primary Metabolic Process | Gene                                                                                                                                                      |
| Glucose Metabolism        | FABP5<br>HK2<br>ITGB1<br>MSTN<br>MYC<br>PRKAA1<br>ZBTB20<br>IDH1                                                                                                                                                                   | Glucose Metabolism        | ALDH5A1<br>BDNF<br>CACNA1A<br>NISCH<br>NPY1R<br>PDK2<br>PDK4<br>HK1<br>IDH3a                                                                              |
| Fatty Acid Metabolism     | ACOT9<br>ALOX5<br>ALOX15B<br>ALOX5AP<br>CAV1<br>CD36<br>CD74<br>CEBPB<br>CROT<br>DBI<br>EDN2<br>ELOVL2<br>FABP4<br>FCER1A<br>GGT5<br>LPL<br>PDPN<br>PECI<br>PLA2G5<br>PTGS1<br>QKI<br>SLC27A3<br>SUCLG2<br>SYK<br>TNFRSF1A<br>TNXB | Fatty Acid Metabolism     | AACS<br>ACOT7<br>ACSL6<br>AKR1C2<br>ALDH5A1<br>ANGPTL3<br>ANKRD26<br>FAAH<br>HNF4A<br>MYO5A<br>OXCT1<br>PDK4<br>PLP1<br>PRKAR2B<br>SCD<br>SLC27A2<br>SNCA |
| Glutamine Metabolism      | DDAH2<br>GFPT2<br>MECP2                                                                                                                                                                                                            | Glutamine Metabolism      | ALDH5A1<br>GLS<br>GLUD1<br>GLUD2                                                                                                                          |
| Nucleotide Metabolism     | ADA<br>REXO2<br>TYMP<br>UPP1                                                                                                                                                                                                       | Nucleotide Metabolism     | CSGALNACT1<br>ENTPD3<br>UGP2                                                                                                                              |

**Supplemental Table: TCGA samples used in analysis**

| <b>Normal Brain Sample ID</b> | <b>GBM Sample ID</b> |
|-------------------------------|----------------------|
| TCGA-06-0673-11               | TCGA-06-0192-01      |
| TCGA-06-0675-11               | TCGA-06-0649-01      |
| TCGA-06-0676-11               | TCGA-06-0686-01      |
| TCGA-06-0678-11               | TCGA-06-0743-01      |
| TCGA-06-0680-11               | TCGA-06-0744-01      |
| TCGA-06-0681-11               | TCGA-06-0745-01      |
| TCGA-08-0623-11               | TCGA-06-0747-01      |
| TCGA-08-0625-11               | TCGA-06-0749-01      |
| TCGA-08-0626-11               | TCGA-06-0750-01      |
| TCGA-08-0627-11               | TCGA-12-0654-01      |
|                               | TCGA-12-0656-01      |
|                               | TCGA-12-0657-01      |
|                               | TCGA-12-0688-01      |
|                               | TCGA-12-0692-01      |
|                               | TCGA-12-0703-01      |
|                               | TCGA-12-0707-01      |
|                               | TCGA-12-0772-01      |
|                               | TCGA-12-0773-01      |
|                               | TCGA-12-0775-01      |
|                               | TCGA-12-0776-01      |
|                               | TCGA-12-0778-01      |
|                               | TCGA-12-0780-01      |
|                               | TCGA-15-0742-01      |
|                               | TCGA-06-0216-01A     |
|                               | TCGA-06-0216-01B     |
